1 SIN-like pathway kinases regulate the end of mitosis in the methylotrophic yeast *Ogataea*  
2 *polymorpha*

3

4

5 Shen Jiangyan<sup>1</sup>, Kaoru Takegawa<sup>1,2</sup>, Gislene Pereira<sup>3,4</sup>, Hiromi Maekawa<sup>1,2\*</sup>

6

7 1. Graduate School of Bioresources and Biotenvironmental Sciences, Kyushu University,  
8 Fukuoka, Japan

9 2. Faculty of Agriculture, Kyushu University, Japan

10 3. Centre for Organismal Studies (COS), University of Heidelberg, Germany

11 4. Division of Centrosomes and Cilia, German Cancer Research Centre (DKFZ), DKFZ-  
12 ZMBH Alliance, Germany

13

14 \* Corresponding author

15 Tel: +81 92 802 4769; E-mail: [hmaekawa@agr.kyushu-u.ac.jp](mailto:hmaekawa@agr.kyushu-u.ac.jp)

16

17 Running Title:

18 The SIN regulates mitotic exit in *O. polymorpha*

19

20

## 21 **Abstract**

22

23 The Mitotic exit network (MEN) is a conserved signalling pathway essential for termination  
24 of mitosis in the budding yeast *Saccharomyces cerevisiae*. All MEN components are highly  
25 conserved in the methylotrophic budding yeast *Ogataea polymorpha*, except for Cdc15  
26 kinase. Amongst *O. polymorpha* protein kinases that have some similarity to ScCdc15, only  
27 two had no other obvious homologues in *S. cerevisiae* and these were named *OpHCD1* and  
28 *OpHCD2* for homologue candidate of ScCdc15. A search in other yeast species revealed that  
29 *OpHcd2* has an armadillo type fold in the C-terminal region as found in SpCdc7 kinases of  
30 the fission yeast *Schizosaccharomyces pombe*, which are homologues of ScCdc15; while  
31 *OpHcd1* is homologous to SpSid1 kinase, a component of the Septation Initiation Network  
32 (SIN) of *S. pombe* not present in the MEN. Since the deletion of either *OpHCD1* or *OpHCD2*  
33 resulted in lethality under standard growth conditions, conditional mutants were constructed

34 by introducing an ATP analog sensitive mutation. For *OpHCD2*, we constructed and used  
35 new genetic tools for *O. polymorpha* that combined the Tet promoter and the improved  
36 auxin-degron systems. Conditional mutants for *OpHCD1* and *OpHCD2* exhibited significant  
37 delay in late anaphase and defective cell separation, suggesting that both genes have roles in  
38 mitotic exit and cytokinesis. These results suggest a SIN-like signalling pathway regulates  
39 termination of mitosis in *O. polymorpha* and that the loss of Sid1/Hcd1 kinase in the MEN  
40 occurred relatively recently during the evolution of budding yeast.

41

42 (234 words)

43

44 Keywords

45 Mitotic Exit Network / Septation Initiation Network / *Ogataea polymorpha* / Cdc15 kinase /

46 Auxin-dependent degradation /Tet promoter

47

48

## 49 **Introduction**

50 In eukaryotic cell division, cytokinesis is tightly linked to the completion of mitosis to  
51 ensure proper segregation of chromosomes into two daughter cells. This is particularly  
52 critical in budding yeast cell division where the site of cytokinesis (bud neck) is determined  
53 before spindle formation, so the progression of cytokinesis must be paused until nuclear  
54 division is completed and one set of chromosomes has passed through the bud neck and  
55 entered the daughter cell body. Therefore, deciding when to exit from mitosis and initiate  
56 cytokinesis is important in cell cycle regulation. In the budding yeast *Saccharomyces*  
57 *cerevisiae* and fission yeast *Schizosaccharomyces pombe*, the completion of mitosis is  
58 regulated by a GTPase-driven signalling pathway named Mitotic Exit Network (MEN) and  
59 Septation Initiation Network (SIN), respectively (hereafter collectively referred to as the  
60 mitotic exit (ME)-signalling pathway). The activation of MEN is essential for mitotic exit  
61 and cytokinesis, and SIN for cytokinesis<sup>1,2</sup>. In *S. cerevisiae*, Cdc15 kinase mediates the  
62 activation of the GTPase Tem1 to the downstream NDR kinase Dbf2 complexed with the  
63 regulatory subunit Mob1<sup>3-5</sup> (Fig. 1A). Although MEN and SIN are evolutionally conserved  
64 pathways, some differences have been noted in the composition, regulation and functional  
65 targets of the signalling components. For example, while Cdc15 kinase directly activates the  
66 NDR kinase Dbf2-Mob1 in MEN, activation of the equivalent SIN NDR kinase Sid2-Mob1

67 requires the sequential action of two kinases: first SpCdc7, which is the homologue of  
68 ScCdc15; second SpSid1 complexed with SpCdc14.<sup>6</sup> No Sid1 homologue has been reported  
69 in either *S. cerevisiae*, *Ashbya gossypii*, or *Candida albicans*, the *Saccharomycetaceae* family  
70 members where the ME-signalling pathway has been investigated. In contrast, the  
71 filamentous fungus *Aspergillus nidulans* has a SIN-like pathway to regulate septation<sup>7</sup>.  
72 While the ultimate goal of MEN in *S. cerevisiae* is to activate Cdc14 phosphatase, the  
73 homologous Clp1 phosphatase is not the essential target of SIN in *S. pombe*, even though it is  
74 also regulated by SIN. The MEN components including Cdc15 have been studied in *Candida*  
75 *albicans* and the signalling pathway was demonstrated to be essential for mitotic exit and  
76 cytokinesis<sup>8</sup>. Interestingly, *CaCDC14* gene is not essential for growth<sup>8,9</sup>. When such  
77 divergences occurred during fungal evolution is not well understood.

78 Phenotypic analysis of gene knockout strains is important to elucidate the biological  
79 functions of a gene of interest. Recently, many non-conventional yeast species have been the  
80 subject of biological and applications research. Since the molecular toolboxes developed for  
81 the model yeasts are not always compatible, much effort has been made to develop suitable  
82 genetic tools, including for methylotrophic budding yeasts such as *Ogataea polymorpha*  
83 which is phylogenetically distant from *S. cerevisiae*, and has been used for industrial  
84 applications as well as biological research<sup>10-12</sup>. Although several strong constitutive as well  
85 as inducible promoters are available for *O. polymorpha*, these are not suited for cell cycle  
86 study. Efficient repression systems of gene function are needed in order to study essential  
87 genes expressed at normal endogenous levels. The inducible promoters that are currently  
88 available express genes at much higher than endogenous levels, which may cause some  
89 unwanted phenotypes in their ON states. Artificially designed inducible promoters such as  
90 the Tet promoter, which can induce/repress gene expression by simply adding a specific  
91 compound into the medium, are ideal for biological studies because no changes in  
92 environmental conditions such as carbon sources and temperature are involved<sup>13</sup>.

93 Proteolytic elimination of protein is another strategy to deplete protein levels in a  
94 cell. The auxin-inducible degron (AID) has proved to be a powerful tool to analyse the  
95 cellular function of essential and non-essential genes in various organisms<sup>14,15</sup>. It has been  
96 used in *O. polymorpha*, but worked well only for small number of genes<sup>16</sup> The modified AID  
97 system (AID2) that provide sharper degradation and higher sensitivity/specificity to the plant  
98 hormone auxin (indole-3-acetic acid, IAA) derivatives as well as the improved AID (iAID)  
99 system using the Tet promoter have been developed in *S. cerevisiae* and other organisms<sup>17 18</sup>.

100 In this report, we identified two essential protein kinases, *OpHCD1* and *OpHCD2*, as  
101 components of the MEN/SIN kinase pathway in *O. polymorpha* that are homologues of Cdc7  
102 and Sid1 in *S. pombe*. In order to obtain tools to construct conditional mutants in *O.*  
103 *polymorpha*, we employed strategies to improve auxin-degron system that were recently  
104 reported in *S. cerevisiae*, and applied these new methods to analyse the two kinases. Our  
105 results demonstrated that both OpHcd1 and OpHcd2 play important roles in mitotic exit and  
106 cytokinesis. The homologues of the second SIN kinase, SpSid1, are found in many budding  
107 yeast species and likely function in mitotic exit as well as cytokinesis.

## 108 **Materials and Methods**

109

### 110 **Yeast strains and plasmids**

111

112 Yeast strains and plasmids used in this study are listed in Table S1. Unless otherwise  
113 indicated, all *O. polymorpha* strains were derived from NCYC 495 and were generated by  
114 PCR-based methods<sup>10,19,20</sup>. *O. polymorpha* cells were transformed by electroporation<sup>21</sup>. To  
115 generate *hcd1*<sup>M80G</sup> allele, primer OpHCD1\_9  
116 (ACCACCCAAAACTCCCAATAATCCACAGCTTGATC) that encodes the M80G  
117 mutation was used to amplify the promoter region and a.a. 1-80 of *HCD1* ORF together with  
118 primer OpHCD1\_7 (CGCTGCAGGTCGACGCGAGCATTTCGTCGATGAGG). A.a. 81-  
119 446 and the downstream terminator sequence was amplified with primers OpHCD1\_10  
120 (GAGTTTTTGGGTGGTGGATCC) and OpHCD1\_8  
121 (CTTAATTAACCCGGGACTTGCCGATCTCAGAGACC). These two DNA fragments  
122 were combined with BamHI digested pFA6a-natNT2 plasmid using NEBuilder HiFi DNA  
123 Assembly Master Mix (E2621, New England Biolabs, Ipswich, MA, USA). The resulting  
124 plasmid (pHM1119) was digested with NsiI and integrated at the *hcd1Δ* locus in HPH1737.  
125 The heterozygous diploid cells were transformed with Ku80+ plasmid (pHM898) and  
126 subjected to tetrad dissection to obtain a haploid clone carrying  
127 *hcd1Δ::hphNT1<<Ophcd1*<sup>M80G</sup>*::natNT2*. Similarly, the *hcd2*<sup>L215G</sup> plasmid (pHM1121) was  
128 constructed with primers OpHCD2\_7  
129 (CGCTGCAGGTCGACGTTCCATGCGAACCACAGAAG), OpHCD2\_8  
130 (CTTAATTAACCCGGGCAATACGAAGACTAGCAGCC), OpHCD2\_9  
131 (ACTTTCGCAGTATTCGCCTATCAAATTCATAGACATCTCG), and OpHCD2\_10  
132 (GAATACTGCGAAAGTGGCTC). The pHM1121 DNA was digested with StuI, and used  
133 to transform HPH1738 by integrating it at the *hcd2Δ* locus. The heterozygous diploid cells  
134 were transformed with pHM898 and subjected to tetrad dissection to obtain a haploid clone  
135 carrying *hcd2Δ::hphNT1<<Ophcd2*<sup>L215G</sup>*::natNT2*. To construct iAID plasmids, OsTIR-  
136 9myc, TetR, mAID, TetR-VP16 hybrid transactivator (tTA) gene-tetO7, spacer-5xflag, and  
137 hphNT1 fragments were PCR amplified from pNHK53, pST1760, pST1872 (obtained from  
138 NBRP Yeast), pCM225<sup>22</sup>, pKL260 (a kind gift from M. Kanemaki), and pFA6a-  
139 hphNT1<sup>20</sup> respectively. *OpURA3*, *OpLEU1*, *OpADE12* fragments including the ORF and 5'-  
140 upstream as well as 3'-downstream regions, *OpADH1* promoter, *OpTEF1* promoter and

141 terminator, *OsSSN6* ORF (scaffold\_1: 94041-96002) were amplified from *O. polymorpha*  
142 genome. These fragments were combined in pRS305 to generate iAID plasmids. The  
143 schematics and sequences of these plasmids used in this study are listed in Table S2.

144

#### 145 **Yeast growth conditions and general methods**

146

147 Yeast strains were grown either in YPD medium containing 200 mg/L adenine, leucine, and  
148 uracil (YPDS) or in synthetic/defined (SD) medium supplemented with appropriate amino  
149 acids and nucleotides<sup>23</sup>. Cells were grown at 30°C unless otherwise indicated. IAA (Merck  
150 KGaA, Darmstadt, Germany), 5-Ad-IAA (A3390, Tokyo Chemical Industry Co., Tokyo,  
151 Japan), 5-Ph-IAA (BioAcademia, Osaka, Japan), were dissolved in ethanol for IAA, or  
152 DMSO for 5-Ad-IAA and 5-Ph-IAA to make a 500 mM stock solution and stored at -20°C.  
153 To induce degradation of the endogenous protein fused with mAID, IAA, 5-Ad-IAA, or 5-  
154 Ph-IAA was added directly to the culture medium at the indicated concentration.

155 Doxycycline (Takara Bio Inc., Shiga, Japan) was dissolved in H<sub>2</sub>O at 10 mg/ml and stored at  
156 -20°C.

157

#### 158 **Microscopy**

159

160 To visualize DNA, yeast cells were fixed in 70% ethanol, washed with phosphate-buffered  
161 saline (PBS), and incubated in PBS containing 1 µg/ml 4',6-diamidino-2-phenylindole  
162 (DAPI). DAPI images were acquired using an ECLIPSE Ti2-A inverted microscope (Nikon)  
163 equipped with a CFI Plan Apo Lambda 100 × objective lens (1.45 numerical aperture), a DS-  
164 Qi2 digital camera, an LED-DA/FI/TX-A triple band filter (Semrock: Exciter, FF01-  
165 378/474/575; Emission, FF01-432/523/702; Dichroic mirror, FF409/493/596-Di02), an LED  
166 light source X-LED1 and differential interference contrast (DIC) for DAPI, or BZ-700 with a  
167 PlanApo 60x objective lens (Keyence Co., Osaka, Jpan). To observe GFP-Tubulin signal, Z-  
168 series images of 0.4µm steps were captured without fixation using a DeltaVision microscope  
169 (Applied Precision, Issaquah, WA, USA) equipped with GFP and TRITC filters (Chroma  
170 Technology Corp., Bellows Falls, VT, USA), a 100× NA 1.4 UPlanSApo oil immersion  
171 objective (IX71; Olympus, Tokyo, Japan), and a camera (CoolSNAP HQ; Roper Scientific,  
172 Trenton, NJ, USA), or BZ-700 with a PlanApo 60x objective lens after fixing in 4%  
173 formaldehyde for 20 min. Images were analysed/processed with SoftWoRx 3.5.0 (Applied  
174 Precision, Issaquah, WA, USA), Prism4.3.0 software<sup>24</sup>, or ImageJ 1.47 (NIH, Bethesda, MD,

175 USA). Adobe Photoshop (Adobe Systems, Inc., San Jose, CA, USA) and Affinity Photo 1.  
176 8.4 (Serif (Europe) Ltd, Nottingham, UK) were used to assemble images for figures.

177

### 178 **RNA analysis**

179

180 Total RNA was isolated from *O. polymorpha* as previously described<sup>25</sup>, treated with DNase I,  
181 and then further purified using the Monarch Total RNA Miniprep Kit (New England Biolabs,  
182 Ipswich, MA, USA). A total of 250 ng RNA was used to synthesize cDNA with Reverse Tra  
183 Ace qPCR RT Master Mix (Toyobo Co., Ltd., Osaka, Japan) according to the manufacturer's  
184 protocol, and a 0.1-0.5 µl cDNA reaction mixture was used in qPCR reactions. Primers  
185 ACT1\_8 (CTTCTTCCCAGTCTTCTGCTATC) and ACT1\_9  
186 (GGGCTCTGAATCTCTCATTACC) were used to amplify ACT1 RNA, and primers  
187 SPC72\_Fw (ATGGCTGACCAAATCCTAGAC) and SPC72\_Rv  
188 (GCTCTCAACTTTGCACTTAACC) for SPC72 RNA.

189

### 190 **Yeast cell extract and immunoblotting**

191

192 Whole cell extracts were prepared for SDS-PAGE and immunoblotting<sup>20,26 27</sup>. Samples  
193 representing 1–2 OD600 of liquid culture were resuspended in 950 µl of cold 0.29 M NaOH  
194 and incubated on ice for 10 min. Then, 150 µl 55% (w/v) trichloroacetic acid was added and  
195 incubated for 10 min on ice. Protein pellets were collected by removing the supernatant after  
196 centrifugation at 14,000 rpm for 15 min at 4°C, then resuspended in high urea buffer (8 M  
197 urea, 5% SDS, 200 mM NaPO<sub>3</sub> pH 6.8, 0.1 mM EDTA, 100 mM dithiothreitol, and  
198 bromophenol blue) and heated at 65°C for 10 min before loading on a gel. Western blotting  
199 was performed using a standard protocol. M2 monoclonal antibody (F1804, Sigma) and  
200 rabbit anti-mouse antibodies (ThermoFisher Scientific) were used to detect flag-tagged  
201 proteins. GE Healthcare Amersham™ ECL Prime Western Blotting Detection Reagent

202



## 203 **Results and Discussion**

204

### 205 ***OpHCD1* and *OpHCD2* encode kinases similar to *S. pombe* SIN kinases**

206

207 A BLAST search of *O. polymorpha* genome sequence using *S. cerevisiae* MEN components  
208 (Tem1, Cdc15, Dbf2, Mob1, Lte1, Ste20, Bub2, and Bfa1) as query sequences identified  
209 homologues of all proteins except *ScCDC15* (Fig. S1). Since ScCdc15 is a member of the  
210 Ste20 family of protein kinases, we suspected that one of Ste20-like kinases may be a  
211 functional homologue and looked more closely at the hits in the BLAST search using the  
212 ScCdc15 amino acid query sequence. Among the top six hits, two ORFs had no obvious  
213 homologues in *S. cerevisiae*, and were named *OpHCD1* and *OpHCD2* (*homologue candidate*  
214 *of ScCdc15*). We performed a phylogenetic analysis of OpHcd1, OpHcd2 and the 4 other top  
215 hits from *O. polymorpha* proteins along with the five proteins closest to either OpHcd1 or  
216 OpHcd2 in *S. cerevisiae* as well as the 8 closest in *S. pombe* (Fig. 1B). The results showed  
217 that OpHcd1 and OpHcd2 have similarity to ScCdc15, SpSid1 and SpCdc7. OpHcd2 displays  
218 22% identity (35% similarity) to ScCdc15, and 21% identity (34% similarity) to SpCdc7.  
219 OpHcd2 has a protein kinase domain near the N-terminus, and in addition contains an  
220 armadillo type fold in the C-terminal region similar to SpCdc7 (Fig. 1C). OpHcd1 is smaller  
221 in size (446 amino acids) and shows only 15% identity (22% similarity) to ScCdc15, but the  
222 amino acid identity is higher to SpSid1 (38% identity and 55% similarity) (Fig. 1C). Thus,  
223 these analyses suggested that OpHcd2 is the homologue to ScCdc15/SpCdc7 and OpHcd1 to  
224 SpSid1. Since a Sid1 homologue has not been reported in budding yeasts, we extended the  
225 BLAST search to other species in *Ascomycota*. Budding yeast species that diverged from the  
226 *S. cerevisiae* lineage at early stages of evolution have an *OpHCD1/Spsid1* homologue gene in  
227 addition to *ScCDC15* homologue in their genomes, while the *S. cerevisiae* lineage has lost it  
228 after the split with the *Wickerhamomyces* lineage (Fig. 1D). These results suggested that  
229 OpHcd1 and OpHcd2 are orthologs of SpCdc7 and SpSid1 and may play roles in late mitosis  
230 in *O. polymorpha*, and that the ancestral SIN-like signalling pathway has lost the Sid1 kinase  
231 relatively recently in budding yeast evolution.

232

233

### 234 **OpHcd1 plays roles in mitosis and cytokinesis**

235



236 To investigate cellular functions of *OpHCD1* and *OpHCD2*, we first constructed deletion  
237 mutants. Heterozygous *hcd1*  $\Delta$  :*hphNT1/HCD1* diploid cells were subjected to tetrad  
238 analysis, where the four spores of each ascus were analysed for the ability to grow on rich  
239 and selective plates. All asci formed one or two colonies (Fig. 2A). None of those growing  
240 were positive for the resistance marker (hygromycin) corresponding to the *hcd1*  $\Delta$  :*hphNT1*  
241 deletion allele, while the segregations of heterologous auxotrophic *leu1-1* and *ura3-1* alleles  
242 were consistent with random segregation (*LEU1:leu1-1*=8:2, *URA3:ura3-1*=6:4 in 5 tetrads)  
243 (Fig. 2A). Similar results were obtained in the tetrad analysis of heterozygous *hcd2*  
244  $\Delta$  :*natNT2/HCD2* diploid cells, where *HCD2* was deleted using nourseothricin (*nat*)  
245 resistance marker (Fig. 2B): no *nat* resistant colonies were obtained while auxotrophic  
246 markers were segregated close to randomly (*LEU1:leu1-1*=7:7, *URA3:ura3-1*=6:8 in 7  
247 tetrads). Thus, both *OpHCD1* and *OpHCD2* genes are essential for growth in *O. polymorpha*.  
248 Spores that were presumed to carry *hcd1*  $\Delta$  or *hcd2*  $\Delta$  allele did not form micro-colonies  
249 after prolonged incubation. Spores were germinated, although the number of cell bodies  
250 varied from spore to spore, and we were unable to determine whether the cells have a defect  
251 in cell cycle progression.

252 Mutating the conserved “gatekeeper” residue in the ATP-binding pocket of protein  
253 kinases to glycine enlarges the pocket so that PP1 analogs such as 1NM-PP1 can occupy it  
254 and inhibit the kinase activity<sup>28</sup>. Since the ATP analog-sensitive (*as*) allele of *ScCDC15*  
255 causes anaphase arrest in the first cell cycle after the drug addition, we introduced the  
256 equivalent mutation into *OpHCD1* and *OpHCD2* (Fig. S2)<sup>29</sup>. The growth of *hcd1*<sup>M80G</sup>  
257 (hereafter called *hcd1-as*) cells was reduced on Yeast Extract–Peptone–Dextrose (YPD) solid  
258 medium containing 0.5  $\mu$ M 1-NM-PP1, and almost abolished at 5  $\mu$ M, therefore we used the  
259 *hcd1-as* allele for the phenotypic analysis of *OpHCD1* (Fig. 2C). In contrast, *hcd2*<sup>L215G</sup>  
260 (hereafter called *hcd2-as*) cells did not show any growth defect in the presence of 1NM-PP1  
261 on YPD plates (Fig. 2C).

262 To investigate cellular functions of OpHcd1, logarithmically growing *hcd1-as* cells  
263 were treated with 1NM-PP1 and both cell division and cellular morphology were examined  
264 over time (Fig. 3A, B). The proportion of unbudded G1 cells was reduced (Fig. 3C), whilst  
265 the proportion of large budded cells with two nuclei, corresponding to anaphase and  
266 telophase cells, was increased from 17.5 % to 32.9 % after 1 hour incubation with 1NM-PP1  
267 (Fig. 3D), suggesting defects in late mitotic progression. After a two hour-incubation, cells  
268 which had initiated budding of the next cell cycle without completion of cytokinesis and/or

269 cell separation in the previous cell cycle became evident (Fig. 3B and 3D). To clarify whether  
270 *hcd1-as* cells have defects in mitotic exit, *hcd1-as* cells expressing GFP-Tub1 (encoding for  
271 tubulin for spindle visualization) were analyzed. The proportion of *hcd1-as* cells with fully  
272 elongated anaphase spindles strongly increased after 2 hours of 1NM-PP1 treatment  
273 compared to wild type cells (Fig. 3E). Furthermore, some cells with a small bud were still  
274 attached to a neighboring cell (Fig. 3F). GFP-Tub1 patterns indicated that both the cell with  
275 the small bud and its neighboring cell were in interphase. However, the cytoplasmic GFP  
276 signals were continuous between the two cells, suggesting that these cells were the mother  
277 and daughter cells from the previous cell cycle and that cytokinesis was still incomplete.  
278 These results suggested that OpHcd1 plays a role in mitotic exit as well as in cytokinesis  
279 and/or cell separation that are difficult to firmly distinguish by the method used.

280 Even though there was no obvious growth defect on YPD plates, the *hcd2-as* cells  
281 transiently accumulated late mitotic cells in the time course experiment, which suggests the  
282 Hcd2-as protein is partially sensitive to 1NM-PP1 (Fig. S3).

283

#### 284 **The iAID system is a new genetic tool for constructing conditional mutants in *O.***

#### 285 *polymorpha*

286

287 In order to analyse the consequences of OpHcd2 loss for cell division, we next considered  
288 conditional depletion of OpHcd2 protein. Previously, we used the AID system in *O.*  
289 *polymorpha* to generate a conditional *OpCDC5* mutant, which encodes the essential polo-like  
290 kinase. However, the C-terminal AID tagging did not work well for *OpHCD2* gene (Fig. S4).  
291 Therefore, we attempted to establish a more efficient gene depletion method that is widely  
292 applicable in *O. polymorpha*. Firstly, we employed the improved AID system in *S. cerevisiae*,  
293 iAID, where the Tet-OFF transcriptional repression system was combined with the existing  
294 AID system<sup>18</sup>. Since the antibiotic resistant marker units commonly used in *S. cerevisiae*  
295 were functional in *O. polymorpha*, we expected that the Tet-OFF system of *S. cerevisiae*  
296 might work in *O. polymorpha*. We then tested the Tet-OFF system for *OpCDC5*, *OpSPC72*,  
297 and GFP genes (Fig. 4A). The *OpCDC5-flag* gene was placed under the Tet promoter for *S.*  
298 *cerevisiae*, which consists of TetO7 repeats and *ScCYC* tata sequence, and the resulting  
299 plasmid was integrated into the *O. polymorpha* genome together with the tetracycline-  
300 controlled TetR-VP16 hybrid transactivator (tTA) gene. Cdc5-flag protein was not detected  
301 in cells growing in YPD medium without doxycycline (promoter ON) by Western blotting  
302 using anti-flag antibody, suggesting the gene was not expressed (Fig. 4A, TetO7-

303 *ScCYC1*tata-*OpCDC5-flag*). We then replaced the *ScCYC1* tata sequence with a tata like  
304 sequence in the upstream region of *OpACT1* gene (TetO7-*OpACT1*tata) (Fig. S5). When  
305 placed under TetO7-*OpACT1*tata, the Cdc5-flag protein was expressed efficiently in all four  
306 independent clones (Fig. 4A). Thus, the P<sub>TetO7-*OpACT1*tata</sub> promoter has a promoter activity  
307 in *O. polymorpha*, and hereafter we refer to it as P<sub>TetO7</sub> or the TetO7 promoter.

308 The addition of doxycycline in YPD medium alone did not lower the Cdc5-flag  
309 protein level expressed from the TetO7 promoter. In *S. cerevisiae*, introduction of *ScSSN6* or  
310 *ScTUPI* fused with the reverse Tet repressor (TetR<sup>'</sup>) is necessary for tight regulation because  
311 of the leaked expression under the repressed conditions<sup>30</sup>. We identified the *ScSSN6*  
312 homologue in *O. polymorpha* genome (scaffold\_1: 94041-96002) and introduced P<sub>TEF1-</sub>  
313 TetR<sup>'</sup>-*OpSSN6-flag* fusion gene into *O. polymorpha* wild type cells. Then, the plasmids  
314 carrying P<sub>TetO7-*OpCDC5-flag*</sub>, P<sub>TetO7-*OpSPC72-flag*</sub>, or P<sub>TetO7-GFP-flag</sub> were integrated into  
315 the genome and the flag-tagged protein were examined in the presence of doxycycline at  
316 different concentrations (Fig. 4B, Fig. S6A). In comparison to control conditions (without  
317 doxycycline), Cdc5-flag and Spc72-flag proteins were lower in the presence of 0.25 µg/ml or  
318 1 µg/ml doxycycline decreasing to 52 % and 57 % of control levels, respectively. Further  
319 increasing doxycycline concentration up to 100µg/ml did not improve the repression of  
320 *OpCdc5* or *OpSpc72* (Fig. S6B). To verify doxycycline-dependent repression of transcription,  
321 we analysed the RNA level of the *OpSPC72* gene in cells carrying P<sub>TetO7-*OpSPC72-flag*</sub>, tTA,  
322 and P<sub>TEF1-TetR<sup>'</sup>-*OpSSN6-flag*</sub> by quantitative RT-PCR using *OpSPC72* specific primers. The  
323 RNA level of *OpSPC72* was reduced after 7 hours incubation in the presence of doxycycline,  
324 but only by 34 % (Fig. 4C). Endogenous *OpSPC72* RNA may be the reason for the  
325 inefficient repression of the *OpSPC72* RNA level.

326 Next, we combined the TetO7 promoter with the AID system. Wild type cells  
327 expressing either P<sub>TetO7-*OpCDC5-flag*</sub> or P<sub>TetO7-mAID-*OpCDC5-flag*</sub> together with tTA,  
328 P<sub>TEF1-TetR<sup>'</sup>-*OpSSN6*</sub>, and P<sub>ADH1-*OsTIR*</sub> (the auxin receptor F-box protein Trans-port  
329 Inhibitor Response1 from *Oryza sativa*, *OsTIR*) were grown in YPD medium containing IAA  
330 and/or doxycycline, and the flag-tagged proteins were examined by Western analysis using  
331 anti-flag antibody (Fig. 4D and Fig. S7). While the Cdc5-flag protein levels were reduced by  
332 only ~20-40%, the mAID-Cdc5-flag protein was depleted by ~80 % (Fig. 4D and Fig. S7).  
333 Thus, the iAID strategy improved the efficiency of the AID system in *O. polymorpha*.

334

335

336 **iAID-*Opbcd2-as* cells exhibit defects in mitotic exit and cytokinesis**

337

338 We then applied the iAID system to the *OpHCD2* gene. The plasmid carrying P<sub>TetO7</sub>-mAID-  
339 *Ophcd2-as* and tTA was inserted at the *OpURA3* locus in *hcd2Δ/+* heterologous diploid cells  
340 carrying P<sub>ADH1</sub>-*OsTIR* and P<sub>TEF1</sub>-*TetR'*-*OpSSN6* (Fig. S8A). Meiosis and sporulation was  
341 induced, and a haploid strain with the genotype P<sub>TetO7</sub>-mAID-*hcd2-as*  $\Delta$  *hcd2* P<sub>ADH1</sub>-*OsTIR*  
342 P<sub>TEF1</sub>-*TetR'*-*SSN6* was obtained by tetrad dissection (hereafter referred to as iAID-*hcd2-as*).  
343 The iAID-*hcd2-as* cells grew normally on YPD medium, but the growth was slower and  
344 reduced on YPD medium containing IAA, doxycycline, and 1NM-PP1 compared with either  
345 cells expressing the wild type *OpHCD2* gene or without *OsTIR* expression (Fig. S8B and  
346 S8C). To further improve the tightness of the mutant, *OsTIR* was replaced by the mutant  
347 versions *OsTIR<sup>D</sup>* and *OsTIR<sup>A</sup>* that give higher sensitivity and specificity to IAA derivatives in  
348 various organisms including *S. cerevisiae*<sup>31</sup>. The *OsTIR<sup>A</sup>* version of the iAID-*hcd2-as* allele  
349 (iAID2-*hcd2-as*) conferred a tighter growth-defective phenotype in the presence of auxin  
350 derivatives that have high affinity to *OsTIR<sup>D</sup>* and *OsTIR<sup>A</sup>*, 5-Ph-IAA or 5-Ad-IAA, at  $\geq 1$   $\mu$ M  
351 compared to wild type *OsTIR* with 500  $\mu$ M IAA (Fig. 5A). Wild type and iAID2-*hcd2-as*  
352 cells expressing *OsTIR<sup>A</sup>* were grown to log phase in YPD medium, when 5-Ad-IAA,  
353 doxycycline, and 1NM-PP1 were added and the cells incubated for a further 2 h, then cell  
354 morphology and DNA were examined by microscopy (Fig. 5B and 5C). In iAID2-*hcd2-as*  
355 cells, the percentage of unbudded G1 cells decreased after 1 h and remained low ( $p < 0.05$ ,  
356 Friedman test), suggesting that the cell cycle was delayed or arrested, while it did not change  
357 significantly in wild type cells ( $p = 0.19$ , Friedman test) (Fig. 5C, upper graphs). Instead, after  
358 1h anaphase/telophase cells (large budded cells with two segregated nuclei) increased to  
359 58.0 % in iAID2-*hcd2-as* cells ( $p < 0.05$ , Friedman test), but not in wild type cells ( $p = 0.50$ ,  
360 Friedman test) (Fig. 5C, lower graphs). Longer incubation time did not increase the  
361 proportion of anaphase/telophase cells, but instead led to the appearance of cells with more  
362 than three cell bodies that remained connected (Fig. 5C, purple), indicating cytokinesis  
363 defects. To confirm the phenotype, GFP-Tub1 was expressed in wild type and iAID2-*hcd2-as*  
364 cells and the cell cycle stages present were determined up to 2h incubation time. In iAID2-  
365 *hcd2-as* mutants the proportion of cells containing anaphase spindles had increased by 1 h  
366 after the addition of 5-Ad-IAA, doxycycline, and 1NM-PP1, but did not exceed 50% (Fig. 5D  
367 and 5E). On further incubation up to 2 hours total, the proportion of anaphase cells had  
368 slightly decreased. Instead chains of cells appeared, which had three or more unseparated cell  
369 bodies in various cell cycle stages based on the GFP-tubulin distribution and structures. Close

370 inspection of cytoplasmic GFP signals in such cells revealed that the cytoplasm between the  
371 cell bodies was often but not always continuous, suggesting possible defects in cytokinesis.  
372 However, it is difficult to distinguish cells that have not completed cytokinesis from those  
373 with cell separation defects solely by the cytoplasmic GFP signal. Thus, these results  
374 suggested that the depletion of OpHcd2 delayed mitotic exit as well as cytokinesis and/or cell  
375 separation.

376 In this study, we investigated the phenotypes of conditional mutants for *OpHCD1* and  
377 *OpHCD2* that encode protein kinases similar to the SIN kinases, SpCdc7 and SpSid1 in *S.*  
378 *pombe*. Both the *hcd1-as* and *iAID2-hcd2-as* mutants exhibited similar phenotypes with a  
379 delay of mitotic exit and cytokinesis/cell separation defects. These results suggested that  
380 OpHcd1 and OpHcd2 are likely components of an MEN/SIN-homologous signaling pathway  
381 in *O. polymorpha* and play important roles in mitotic exit and cytokinesis. Because *hcd1-as*  
382 and *iAID2-hcd2-as* cells only transiently arrested the cell cycle in anaphase during time-  
383 course experiments, we assume that these conditional mutant alleles have some leakiness in  
384 liquid media, even though they exhibited severe growth defect on solid medium under  
385 restrictive conditions. It is unclear why the analog-sensitive mutation made the Hcd2 protein  
386 sensitive to 1NM-PP1 but was insufficient for the construction of a conditional mutant. It is  
387 known that cells can tolerate the reduced activity of several kinases<sup>28</sup>. Lower levels of Hcd2  
388 activity may be sufficient for cell division.

389 The MEN in *S. cerevisiae* and the SIN in *S. pombe* are equivalent signalling pathways.  
390 However, they diverge in their detailed signalling architecture and roles in the cell cycle.  
391 While the activation of the GTPase in the MEN is transduced to the most downstream NDR  
392 kinase Dbf2-Mob1 through a single kinase, Cdc15, the SIN requires two kinases.  
393 Phylogenetic evidence clearly indicates that the SIN type is the ancestral form and the loss of  
394 the second kinase occurred more recently in budding yeast evolution (Fig. 1D). The  
395 significance of having the second kinase in the pathway is not understood. The MEN-type  
396 signalling composition may simply have altered the regulatory mechanism to compensate and  
397 bypass the requirement for the second kinase. However, it may be possible that the MEN-  
398 type had a functional advantage over the SIN-type for the budding style of cell division.  
399 Importantly, ScCdc15 is a simultaneous detector for both the Tem1 activation, which occurs  
400 when one nucleus enters into the daughter cell body (spatial), and the Cdc5 kinase activity,  
401 which is high during mitosis (temporal), to ensure that mitotic exit occurs only after the  
402 completion of nuclear division and segregation<sup>32</sup>. As for the SIN, how the kinases are  
403 regulated and which kinase senses signals such as cell cycle stages, environmental

404 information, are not understood. It may be reasonable to speculate that Cdc15 in *S. cerevisiae*  
405 inherits functions of both kinases in the SIN-like pathway and became a merging point of  
406 different signals that had separate target kinase to modulate the SIN-type pathway. Further  
407 study will be required to determine whether the MEN-type architecture has advantages in the  
408 budding yeast cell division. Understanding which signalling components are regulated by  
409 spatial and temporal signals in *O. polymorpha* may help clarify the roles of each kinase in the  
410 SIN-type pathway.

411           While the SIN in *S. pombe* primarily regulates cytokinesis, the MEN in *S. cerevisiae*  
412 is essential for mitotic exit and cytokinesis. Similarly to the MEN, the pathway in *C. albicans*  
413 plays key roles in driving mitotic exit, cytokinesis, and cell separation. In *S. cerevisiae*, all  
414 core components of the MEN are essential for signalling to activate the downstream Cdc14  
415 phosphatase and thus common phenotypes are shared among their mutants. In contrast, in *C.*  
416 *albicans*, mutants of core components exhibited diverse phenotypes. Thus each component  
417 may have distinct roles to achieve the cellular functions of the ME-signalling pathway:  
418 CaTem1 and CaCdc15 for mitotic exit, CaDbf2 primarily for cytokinesis, and the non-  
419 essential CaCdc14 for cell separation. It is unclear whether the divergent roles of each of the  
420 signalling components is unique to *C. albicans* and related to its ability to switch the  
421 morphological forms of growing cells from yeast form to pseudo-hyphae or true hyphae; or  
422 alternatively this diversity of roles is common among other budding yeast species in  
423 Saccharomycetaceae. The results of this study suggest that the regulation of mitotic exit was  
424 placed under the ME-signalling pathway during the evolution of Saccharomycetaceae.  
425 Further analysis on other components of the ME-signalling pathway in *O. polymorpha* will  
426 shed light on the conservation and divergence of the roles and regulation of each component  
427 of the ME-signalling pathway in yeasts.

428



## 429 **Acknowledgements**

430

431 We thank Dr. S. Tanaka for technical advice, National BioResource Project Yeast for  
432 materials, the Research Support Center, Research Center for Human Disease Modeling,  
433 Kyushu University Graduate School of Medical Sciences for technical support. We are  
434 grateful to Drs. J. Kanoh and Y. Higuchi for their support, and Dr. D. Drummond for critical  
435 reading of the manuscript. The work was supported by JSPS Scientific Research (C)  
436 JP19K06641, Initiative for Realizing Diversity in the Research Environment, a grant from  
437 Institute for Fermentation Osaka, and a grant from Noda Institute for Scientific Research to  
438 H.M., and Initiative for Realizing Diversity in the Research Environment to Kyushu  
439 University.

440

## 441 **Author Contributions**

442

443 Conceived the project: HM. Designed and carried out the experiments: HM, SJ. Analysing  
444 the data: HM, SJ, GP, KT. Wrote the manuscript: HM, SJ, GP.

445

## 446 **Competing Interests**

447

448 The authors declare that they have no competing interests.

449

450

451

452

453

## 454 **Figure legends**

455

456 Figure 1 *OpHCD1* and *OpHCD2* encode protein kinases homologous to Sid1 and Cdc7  
457 in *S. pombe*.

458 (A) Schematics of the core components of the MEN and SIN and the homologous pathway in

459 *O. polymorpha*. The protein IDs for *O. polymorpha* proteins are according to the reference

460 30.



461 (B) Phylogenetic tree of protein kinases from *S. cerevisiae*, *O. polymorpha*, and *S. pombe* that  
462 have similarity with *S. cerevisiae* Cdc15.

463 Phylogenetic tree was constructed in MEGAX with the Maximum Likelihood Method.

464 Shown is the Bootstrap Consensus Tree.

465 (C) Schematic representation of the OpHcd1, OpHcd2, ScCdc15, SpCdc7, and SpSid1  
466 proteins. Blue and green boxes are the protein kinase domain and the armadillo type fold,  
467 respectively. The numbers are from the amino acid identity alignment between two kinases  
468 across the length of the proteins.

469 (D) Conservation of ScCdc15/SpCdc7 and SpSid1 in Ascomycota. Phylogenetic relationships  
470 are based on Shen et. al<sup>33</sup>. Tree is not in scale.

471

472 Figure 2 *OpHCD1* and *OpHCD2* are essential for growth

473 (A) Tetrad analysis of heterozygous *hcd1*  $\Delta$  /+ diploid cells (HPH1834). Cells were  
474 incubated on an MAME sporulation plate before dissection of spores. Two or fewer colonies  
475 were formed in all tetrads.

476 (B) Tetrad analysis of heterozygous *hcd2*  $\Delta$  /+ diploid cells (HPH2251). Cells were  
477 incubated on an MAME sporulation plate before dissection of spores. Two or fewer colonies  
478 were formed in all tetrads.

479 (C) Growth assay of the *hcd1-as* and *hcd2-as* mutants. Serial dilutions of wild type  
480 (HPH954), *hcd1-as* (HPH1894), and *hcd2-as* (HPH1909) strains were spotted on YPDS agar  
481 plates containing the indicated concentration of 1NM-PP1 and incubated at 30 °C.

482

483 Figure 3 *Hcd1-as* cells have defects in mitosis and cytokinesis

484 (A) Logarithmically growing wild type (HPH1047) and *hcd1-as* (HPH1894) cells in YPDS  
485 medium were incubated with 5  $\mu$ M 1NM-PP1 at 30 °C for 1 hrs. Cells were fixed with 70%  
486 ethanol and DNA was stained with DAPI. Merged image combines DAPI fluorescence and  
487 brightfield. Scale bar, 10  $\mu$ m.

488 (B) DAPI image of *hcd1-as* in the same experiment as in (A). Cells were fixed after 2 hrs.  
489 Asterisks indicate unseparated cells. Scale bar, 10  $\mu$ m.

490 (C, D) Quantification of A and B. C: percentage of unbudded cells with one nucleus. D:  
491 percentage of large budded cells with two nuclei, one in the mother and the other in the bud,  
492 and unseparated large cell bodies with two or more nuclei. More than 100 cells were analysed

493 at each time point. The experiment was performed in triplicate and the combined results are  
494 shown.

495 (E) Logarithmically growing wild type (HPH1968) and *hcd1-as* (HPH1969) cells carrying  
496 *GTP-TUB1* in YPDS medium were incubated with 5  $\mu$ M 1NM-PP1 at 30 °C for 2 hrs.

497 Images were captured without fixation. Bright field image and GFP fluorescence image are  
498 merged. Shown are projected images. Scale bar, 5  $\mu$ m.

499 (F) Incomplete cytokinesis and cell separation of *hcd1-as* cells from the experiment in E.

500 Asterisks indicate newly formed buds. White arrows point the connections between mother  
501 and daughter cells of the last cell cycle. Scale bar, 2  $\mu$ m.

502

503 Figure 4 The iAID system in *O. polymorpha*

504 (A) Cdc5 protein levels expressed from the modified Tet promoters. Cdc5-5flag protein was  
505 exogenously expressed from TetO7-TATA<sub>ScCYC1</sub> promoter or TetO7-TATA<sub>OpACT1</sub> promoter  
506 in wild type cells expressing TetR-VP16. Total cell extracts were prepared and subjected to a  
507 western analysis using anti-flag antibody. Three and four independent clones of HPH1942  
508 and HPH1943, respectively, were analysed. No plasmid: wild type cells not carrying the  
509 OpCDC5-5flag plasmid (HPH656).

510 (B) Cdc5-5flag, Spc72-5flag, or GFP-5flag protein level expressed from the Tet promoter in  
511 the presence of doxycycline. CDC5-5flag (HPH2004), SPC72-5flag (HPH2008), or GFP-  
512 5flag (HPH2009) genes were placed under TetO7-TATA<sub>OpACT1</sub> promoter in wild type cells  
513 carrying P<sub>CMV-tTA</sub>, P<sub>OpTEF1-TetR'-OpSSN6-5flag</sub>. Cells were pre-cultured in YPDS at 30 °C,  
514 then doxycycline was added at the indicated concentration and incubated for 5 hrs at 30 °C.  
515 Total cell extracts were prepared and subjected to a western analysis using anti-flag antibody.  
516 Note that the two slowest migrating bands correspond to the TetR'-Ssn6-5flag. No-tag: wild  
517 type (HPH951). Intensity of bands was quantified with ImageJ software.

518 (C) The *SPC72* RNA expression level. Wild type cells carrying P<sub>TetO7-OpSPC72-5flag</sub>, tTA,  
519 and P<sub>OpTEF1-TetR'-OpSSN6-5flag</sub> (HPH2008) were grown in YPDS. Doxycycline was added  
520 at indicated concentration and cells were incubated at 30 °C for 7 hrs. Total RNAs were  
521 subjected to qRT-PCR analysis for *SPC72* RNA and *ACT1* RNA. Relative expression to that  
522 without doxycycline was calculated. The experiment was performed in triplicate and the  
523 combined results are shown.

524 (D) Cdc5 protein level expressed by the iAID system. Wild type diploid cells carrying either  
525 P<sub>TetO7-CDC5-5flag</sub> (HPH2044) or P<sub>TetO7-mAID-CDC5-5flag</sub> (HPH2046) as well as P<sub>ADH1-</sub>  
526 *OsTIR*, P<sub>CMV-tTA</sub>, P<sub>OpTEF1-TetR'-OpSSN6-5flag</sub> and wild type haploid cells were grown in

527 SD medium supplemented with appropriate nucleotide and amino acids in the presence or  
528 absence of 20 mg/ml doxycycline. IAA and 1NM-PP1 were added at 0.5 mM and incubated  
529 at 30 °C for 2.5 hrs. Total cell extracts were prepared and subjected to a western analysis  
530 using anti-flag antibody. Intensity of bands was quantified with ImageJ software. Similar  
531 result was shown in Fig. S5.

532

533 Figure 5 OpHcd2 depleted cells are defective in mitotic exit and cytokinesis

534 (A) Serial dilutions of strains with the indicated genotype were spotted on YPDS agar plates  
535 containing IAA, 5-Ph-IAA, or 5-Ad-IAA at the indicated concentrations and incubated at 30  
536 °C for 1day. Yeast strains: HPH656, HPH2067, HPH2254, HPH2246, HPH2270, HPH2244,  
537 HPH2245, HPH2247.

538 (B) DAPI staining of *iAID2-hcd2-as* strains. Wild type (HPH2247) and *iAID2-hcd2-as* cells  
539 (HPH2245) carrying  $P_{ADH1}$ -*OsTIR*<sup>4</sup>,  $P_{CMV}$ -tTA,  $P_{OpTEF1}$ -*TetR*'-*OpSSN6-5flag* were grown in  
540 YPDS medium until logarithmic growth phase. Dox, IAA, and NM-PP1 were added at 5  
541 µg/ml, 0.5 mM, and 5µM, respectively, and incubated at 30 °C for up to 2 hrs. Cells were  
542 fixed with 70 % ethanol and DNA was stained with DAPI. Shown are merged images of  
543 bright field and DAPI images. Scale bar, 10 µm. Arrows indicate failure of cell separation in  
544 the previous mitosis.

545 (C) Quantification of B. Upper graphs: percentage of unbudded cells with one nucleus.  
546 Lower graphs: percentage of large budded cells with two nuclei, one in the mother and the  
547 other in the bud, and unseparated three or more cell bodies with two or more nuclei.

548 (D) GFP-tubulin was examined by epifluorescence microscopy in wild type and *iAID2-hcd2-*  
549 *as* strains. Wild type (HPH2258) and *iAID2-hcd2-as* cells (HPH2260) carrying  $P_{ADH1}$ -  
550 *OsTIR*<sup>4</sup>,  $P_{CMV}$ -tTA,  $P_{OpTEF1}$ -*TetR*'-*OpSSN6-5flag* and expressing *GFP-TUB1* were grown in  
551 YPDS medium until logarithmic growth phase. Dox, IAA, and NM-PP1 were added at 5  
552 µg/ml, 0.5 mM, and 5µM, respectively, and incubated at 30 °C for up to 2 hrs. Cells were  
553 fixed with 4% formaldehyde for 20 min and washed with PBS before microscopy. Asterisks  
554 indicate anaphase spindle. Shown are merged images of bright field image and DAPI image.  
555 Scale bar, 5 µm.

556 (E) Quantification of D. Upper graphs: percentage of unbudded G1 cells. Lower graphs:  
557 percentage of budded cells with anaphase spindle and unseparated three or more cell bodies  
558 without anaphase spindle.

559 (F) Incomplete cytokinesis and cell separation of *iAID2-hcd2-as* cells from the experiment in  
560 E. Asterisks indicate newly formed buds. Yellow and white arrows point the complete

561 separation and the connection between mother and daughter cells of the previous cell cycle,  
562 respectively. Brightfield (left) and epifluorescence (GFP) (right) image. Scale bar, 2  $\mu\text{m}$ .

## 563 Supplemental materials

564

565 Table S1. Yeast strains and plasmids.

566

567 Table S2. iAID plasmids for *O. polymorpha*.

568

569

570 Figure S1. Result of BLAST search using blastp for *O. polymorpha* model proteins at the  
571 genome portal of the Department of Energy Joint Genome Institute  
572 (<https://mycocosm.jgi.doe.gov/Hanpo2/Hanpo2.home.html>)<sup>34</sup>.

573

574 Figure S2. Amino acid alignments of OpHcd1, OpHcd2, ScCdc15, SpCdc7, and SpSid1.  
575 Amino acid sequences of OpHcd1, ScCdc15, and SpSid1 (A) or OpHcd2, ScCdc15, and  
576 SpCdc7 (B) were aligned with MafftWS by Jalview 2.8.2<sup>35</sup>. Asterisks indicate the position of  
577 the amino acid of ScCdc15 whose mutation to glycine caused the ATP-analog 1NM-PP1  
578 sensitivity.

579

580 Figure S3. *hcd2-as* cells transiently accumulated late mitotic cells after addition of 1NM-PP1  
581 Logarithmically growing wild type (HPH2186) and *hcd2-as* (HPH1870) cells in YPDS  
582 medium were incubated with 5  $\mu$ M 1NM-PP1 at 30 °C. Cells were fixed with 70% ethanol  
583 and DNA was stained with DAPI. The graph shows the percentage of large budded cells with  
584 two nuclei, one in the mother and the other in the bud, which represents the late mitotic stage.  
585 More than 100 cells were analysed at each time point.

586

587 Figure S4. Growth assay of the *hcd2-mAID* mutant.

588 Serial dilutions of wild type (HPH1319), *hcd2-mAID* (HPH1599, HPH1600) strains were  
589 spotted on YPDS agar plates containing the indicated concentration of IAA and incubated at  
590 30 °C.

591

592 Figure S5. Promoter region of *OpACT1* gene.

593 (A) Schematic map of the DNA sequence surrounding *OpACT1* gene

594 (scaffold\_5:1,140,451..1,142,929) drawn with SnapGene (GSL Biotech LLC). The DNA

595 sequence was obtained at the genome portal of the Department of Energy Joint Genome  
596 Institute (<https://mycocosm.jgi.doe.gov/Hanpo2/Hanpo2.home.html>)<sup>34</sup>  
597 (B) Genomic nucleotide sequence of *OpACT1* gene and the upstream region. Dark grey  
598 boxes with bold letters are exons 1-3. Italics in a grey box is the TATA-like sequence used  
599 in Tet-OFF system for *O. polymorpha*. Light grey marks the upstream ORF.

600

601 Figure S6 Tet-OFF system in *O. polymorpha*

602 (A) Schematic maps of the plasmids used to construct the *OpCDC5* Tet-OFF strain. Both  
603 pHM1129 and pHM1133 plasmids were integrated into *OpURA3*. The maps were drawn with  
604 SnapGene.

605 (B) Cdc5-5flag and Spc72-5flag protein level expressed from the Tet promoter in the  
606 presence of doxycycline. *CDC5*-5flag (HPH2004) and *SPC72*-5flag (HPH2008) genes were  
607 placed under TetO7-TATA<sub>OpACT1</sub> promoter in wild type cells carrying P<sub>CMV-tTA</sub>, P<sub>OpTEF1</sub>-  
608 *TetR'*-*OpSSN6*-5flag. Cells were pre-cultured in YPDS at 30 °C, then doxycycline was added  
609 at the indicated concentration and incubated for 5 hrs at 30 °C. Total cell extracts were  
610 prepared and subjected to a western analysis using anti-flag antibody. Wild type cells  
611 carrying P<sub>OpTEF1</sub>-*TetR'*-*OpSSN6*-5flag (HPH1926) was used as the negative control. Note that  
612 the two slowest migrating bands correspond to the TetR'-Ssn6-5flag. Intensity of bands were  
613 measured with ImageJ.

614

615 Figure S7 Regulation of *CDC5*-5flag expression by the iAID system

616 Cdc5 protein level expressed by the iAID system. Wild type diploid cells carrying either  
617 P<sub>TetO7</sub>-*CDC5*-5flag (HPH2049) or P<sub>TetO7</sub>-*mAID*-*CDC5*-5flag (HPH2053) as well as P<sub>ADH1</sub>-  
618 *OsTIR*, P<sub>CMV-tTA</sub>, P<sub>OpTEF1</sub>-*TetR'*-*OpSSN6*-5flag and wild type diploid cells carrying P<sub>ADH1</sub>-  
619 *OsTIR* and P<sub>OpTEF1</sub>-*TetR'*-*OpSSN6*-5flag were grown in SD medium supplemented with  
620 appropriate nucleotide and amino acids in the presence of doxycycline at the indicated  
621 concentration. IAA was added at 0.5 mM and incubated at 30 °C for 2.5 hrs. Total cell  
622 extracts were prepared and subjected to a western analysis using anti-flag antibody. Intensity  
623 of bands was quantified with ImageJ software.

624

625 Figure S8 Phenotype of the iAID-*hcd2-as* mutant

626 (A) Schematics of the plasmids used to construct the *iAID-hcd2-as* mutant carry in the *hcd2*  
627  $\Delta$  background. The plasmids, pHM1153 and pHM1177, were integrated into *OpURA3* and  
628 *OpLEU1* loci, respectively. The maps were drawn with SnapGene.

629 (A) Growth assay of the *iAID-hcd2-as* mutant. Serial dilutions of strains with the indicated  
630 genotype were spotted on a YPDS agar plate and a YPDS plate containing 0.5 mM IAA, 20  
631  $\mu$ g/ml doxycycline, and 5  $\mu$ M NM-PP1 and incubated at 30 °C for 1 day. Yeast strains:  
632 HPH2194, HPH2195, HPH2196, HPH2197, HPH2198.

633 (B) DAPI staining of *iAID-hcd2-as* strains. Wild type (HPH2176) and *iAID-hcd2-as* cells  
634 (HPH2105) carrying  $P_{ADH1}$ -*OsTIR*,  $P_{CMV}$ -tTA,  $P_{OpTEF1}$ -*TetR'*-*OpSSN6-5flag* as well as *hcd2-*  
635 *as* cells (HPH1870) were grown in YPDS medium until logarithmical growth phase.  
636 Doxycycline, IAA, and NM-PP1 were added at 5  $\mu$ g/ml, 0.5 mM, and 5  $\mu$ M, respectively,  
637 and incubated at 30 °C for 2 hrs. Cells were fixed with 70 % ethanol and DNA was stained  
638 with DAPI. Bright field image and DAPI image were merged. Scale bar, 10  $\mu$ m. Arrows  
639 indicate failure of cell separation in the previous mitosis.

640



641 **References**

- 642 1. Baro B, Queralt E, Monje-Casas F. Regulation of Mitotic Exit in *Saccharomyces*  
643 *cerevisiae*. *Methods Mol Biol* 2017; 1505:3–17.
- 644 2. Meitinger F, Palani S, Pereira G. The power of MEN in cytokinesis. *Cell Cycle* 2012;  
645 11:219–28.
- 646 3. Jaspersen SL, Charles JF, Tinker-Kulberg RL, Morgan DO. A late mitotic regulatory  
647 network controlling cyclin destruction in *Saccharomyces cerevisiae*. *Mol Biol Cell*  
648 1998; 9:2803–17.
- 649 4. Luca FC, Winey M. MOB1, an essential yeast gene required for completion of mitosis  
650 and maintenance of ploidy. *Mol Biol Cell* 1998; 9:29–46.
- 651 5. Komarnitsky SI, Chiang YC, Luca FC, Chen J, Toyn JH, Winey M, Johnston LH,  
652 Denis CL. DBF2 protein kinase binds to and acts through the cell cycle-regulated  
653 MOB1 protein. *Molecular and Cellular Biology* 1998; 18:2100–7.
- 654 6. Guertin DA, Chang L, Irshad F, Gould KL, McCollum D. The role of the *sid1p* kinase  
655 and *cdc14p* in regulating the onset of cytokinesis in fission yeast. *EMBO J* 2000;  
656 19:1803–15.
- 657 7. Kim J-M, Zeng CJT, Nayak T, Shao R, Huang A-C, Oakley BR, Liu B. Timely  
658 septation requires SNAD-dependent spindle pole body localization of the septation  
659 initiation network components in the filamentous fungus *Aspergillus nidulans*. *Mol*  
660 *Biol Cell* 2009; 20:2874–84.
- 661 8. Bates S. *Candida albicans* Cdc15 is essential for mitotic exit and cytokinesis. *Sci Rep*  
662 2018; 8:8899.
- 663 9. Milne SW, Cheetham J, Lloyd D, Shaw S, Moore K, Paszkiewicz KH, Aves SJ, Bates  
664 S. Role of *Candida albicans* Tem1 in mitotic exit and cytokinesis. *Fungal Genet Biol*  
665 2014; 69:84–95.
- 666 10. Saraya R, Krikken AM, Kiel JA, Baerends RJS, Veenhuis M, Klei IJ. Novel genetic  
667 tools for *Hansenula polymorpha*. *FEMS Yeast Research* 2012; 12:271–8.
- 668 11. Ito Y, Terai G, Ishigami M, Hashiba N, Nakamura Y, Bamba T, Kumokita R,

- 669 Hasunuma T, Asai K, Ishii J, et al. Exchange of endogenous and heterogeneous yeast  
670 terminators in *Pichia pastoris* to tune mRNA stability and gene expression. *Nucleic*  
671 *Acids Res* 2020; 48:13000–12.
- 672 12. Xiong X, Chen S. Expanding Toolbox for Genes Expression of *Yarrowia lipolytica* to  
673 Include Novel Inducible, Repressible, and Hybrid Promoters. *ACS Synth Biol* 2020;  
674 9:2208–13.
- 675 13. McIsaac RS, Oakes BL, Wang X, Dummit KA, Botstein D, Noyes MB. Synthetic gene  
676 expression perturbation systems with rapid, tunable, single-gene specificity in yeast.  
677 *Nucleic Acids Res* 2013; 41:e57–7.
- 678 14. Nishimura K, Fukagawa T, Takisawa H, Kakimoto T, Kanemaki M. An auxin-based  
679 degron system for the rapid depletion of proteins in nonplant cells. *Nat Methods* 2009;  
680 6:917–22.
- 681 15. Nishimura K, Kanemaki MT. Rapid depletion of budding yeast proteins via the fusion  
682 of an auxin-inducible degron (AID). *Current Protocols in Cell Biology* 2014; 64:1–16.
- 683 16. Maekawa H, Neuner A, Rüttnick D, Schiebel E, Pereira G, Kaneko Y. Polo-like  
684 kinase Cdc5 regulates Spc72 recruitment to spindle pole body in the methylotrophic  
685 yeast *Ogataea polymorpha*. *eLife* 2017; 6:e24340.
- 686 17. Nishimura K, Yamada R, Hagihara S, Iwasaki R, Uchida N, Kamura T, Takahashi K,  
687 Torii KU, Fukagawa T. A super-sensitive auxin-inducible degron system with an  
688 engineered auxin-TIR1 pair. *Nucleic Acids Res* 2020; 48:e108.
- 689 18. Tanaka S, Miyazawa-Onami M, Iida T, Araki H. iAID: an improved auxin-inducible  
690 degron system for the construction of a “tight” conditional mutant in the budding yeast  
691 *Saccharomyces cerevisiae*. *Yeast* 2015; 32:567–81.
- 692 19. Lu SF, Tolstorukov II, Anamnat S, Kaneko Y, Harashima S. Cloning, sequencing,  
693 and functional analysis of H-OLE1 gene encoding delta9-fatty acid desaturase in  
694 *Hansenula polymorpha*. *Appl Microbiol Biotechnol* 2000; 54:499–509.
- 695 20. Janke C, Magiera MM, Rathfelder N, Taxis C, Reber S, Maekawa H, Moreno-  
696 Borchart A, Doenges G, Schwob E, Schiebel E, et al. A versatile toolbox for PCR-

- 697 based tagging of yeast genes: new fluorescent proteins, more markers and promoter  
698 substitution cassettes. *Yeast* 2004; 21:947–62.
- 699 21. Faber KN, Haima P, Harder W, Veenhuis M, AB G. Highly-efficient  
700 electrotransformation of the yeast *Hansenula polymorpha*. *Current Genetics* 1994;  
701 25:305–10.
- 702 22. Bellí G, Garí E, Aldea M, Herrero E. Functional analysis of yeast essential genes using  
703 a promoter-substitution cassette and the tetracycline-regulatable dual expression  
704 system. *Yeast* 1998; 14:1127–38.
- 705 23. Sherman F. Getting started with yeast. *Meth Enzymol* 1991; 194:3–21.
- 706 24. Chen H, Clyborne WK, Sedat JW, Agard DA. PRIISM: an integrated system for  
707 display and analysis of 3-D microscope images. *SPIE/IS&T 1992 Symposium on*  
708 *Electronic Imaging: Science and Technology* 1992; 1660:784–90.
- 709 25. Maekawa H, Kaneko Y. Inversion of the chromosomal region between two mating  
710 type loci switches the mating type in *Hansenula polymorpha*. *PLoS Genet* 2014;  
711 10:e1004796.
- 712 26. Knop M, Siegers K, Pereira G, Zachariae W, Winsor B, Nasmyth K, Schiebel E.  
713 Epitope tagging of yeast genes using a PCR-based strategy: More tags and improved  
714 practical routines. *Yeast* 1999; 15:963–72.
- 715 27. Meitinger F, Palani S, Pereira G. Detection of Phosphorylation Status of Cytokinetic  
716 Components. *Methods Mol Biol* 2016; 1369:219–37.
- 717 28. Bishop AC, Ubersax JA, Petsch DT, Matheos DP, Gray NS, Blethrow J, Shimizu E,  
718 Tsien JZ, Schultz PG, Rose MD, et al. A chemical switch for inhibitor-sensitive alleles  
719 of any protein kinase. *Nature* 2000; 407:395–401.
- 720 29. D'Aquino KE, Monje-Casas F, Paulson J, Reiser V, Charles GM, Lai L, Shokat KM,  
721 Amon A. The protein kinase Kin4 inhibits exit from mitosis in response to spindle  
722 position defects. *Molecular Cell* 2005; 19:223–34.
- 723 30. Bellí G, Garí E, Piedrafita L, Aldea M, Herrero E. An activator/repressor dual system  
724 allows tight tetracycline-regulated gene expression in budding yeast. *Nucleic Acids*

- 725 Res 1998; 26:942–7.
- 726 31. Yesbolatova A, Saito Y, Kitamoto N, Makino-Itou H, Ajima R, Nakano R, Nakaoka  
727 H, Fukui K, Gamo K, Tominari Y, et al. The auxin-inducible degron 2 technology  
728 provides sharp degradation control in yeast, mammalian cells, and mice. *Nature*  
729 *Communications* 2020; 11:5701–13.
- 730 32. Rock JM, Amon A. Cdc15 integrates Tem1 GTPase-mediated spatial signals with Polo  
731 kinase-mediated temporal cues to activate mitotic exit. *Genes & Development* 2011;  
732 25:1943–54.
- 733 33. Shen X-X, Zhou X, Kominek J, Kurtzman CP, Hittinger CT, Rokas A. Reconstructing  
734 the Backbone of the Saccharomycotina Yeast Phylogeny Using Genome-Scale Data.  
735 *G3 (Bethesda)* 2016; 6:3927–39.
- 736 34. Nordberg H, Cantor M, Dusheyko S, Hua S, Poliakov A, Shabalov I, Smirnova T,  
737 Grigoriev IV, Dubchak I. The genome portal of the Department of Energy Joint  
738 Genome Institute: 2014 updates. *Nucleic Acids Res* 2014; 42:D26–31.
- 739 35. Waterhouse AM, Procter JB, Martin DMA, Clamp M, Barton GJ. Jalview Version 2-a  
740 multiple sequence alignment editor and analysis workbench. *Bioinformatics* 2009;  
741 25:1189–91.
- 742

Figure 1

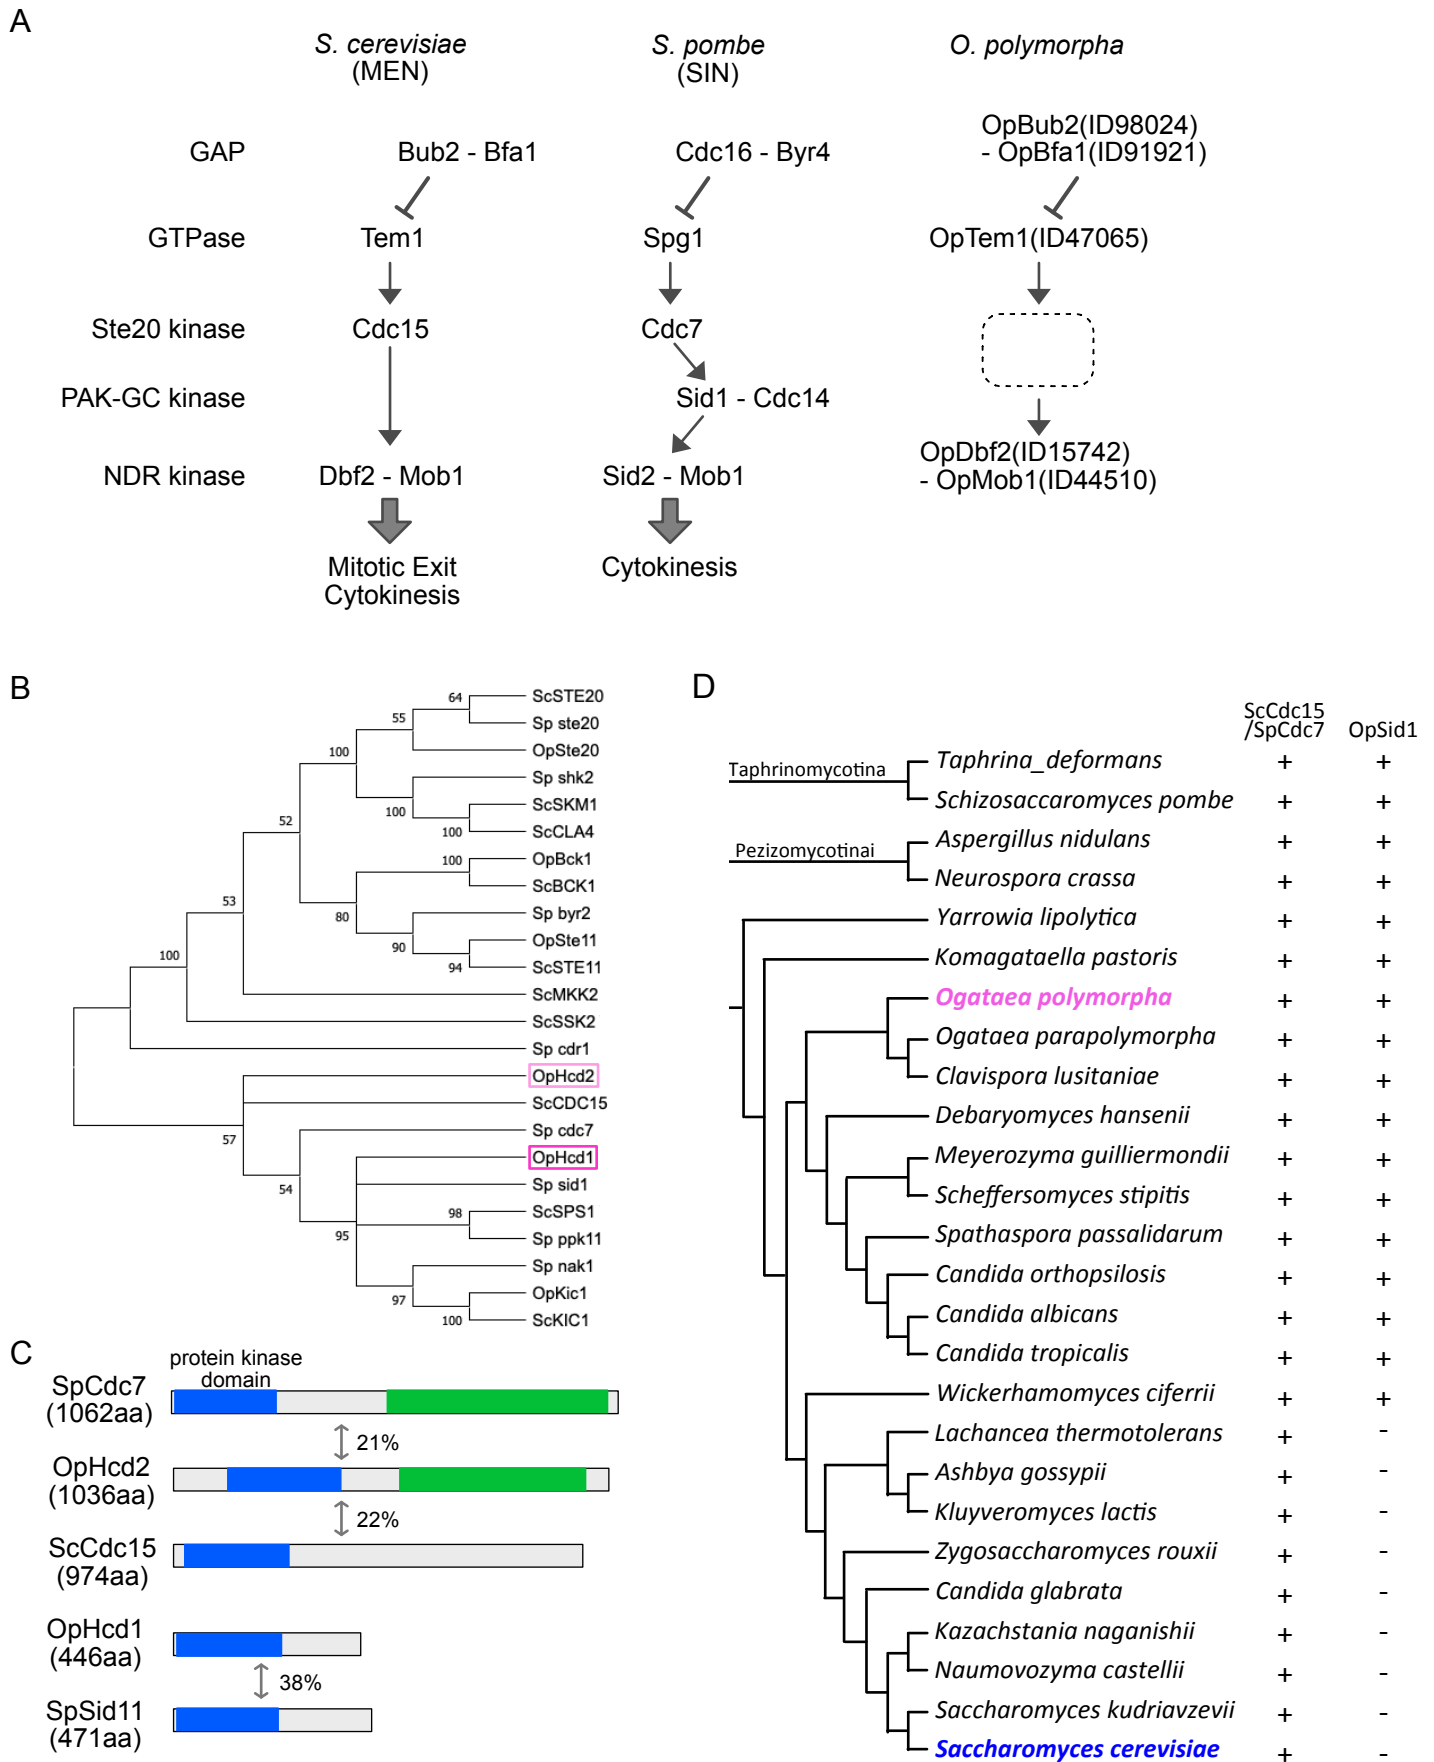

Figure 2

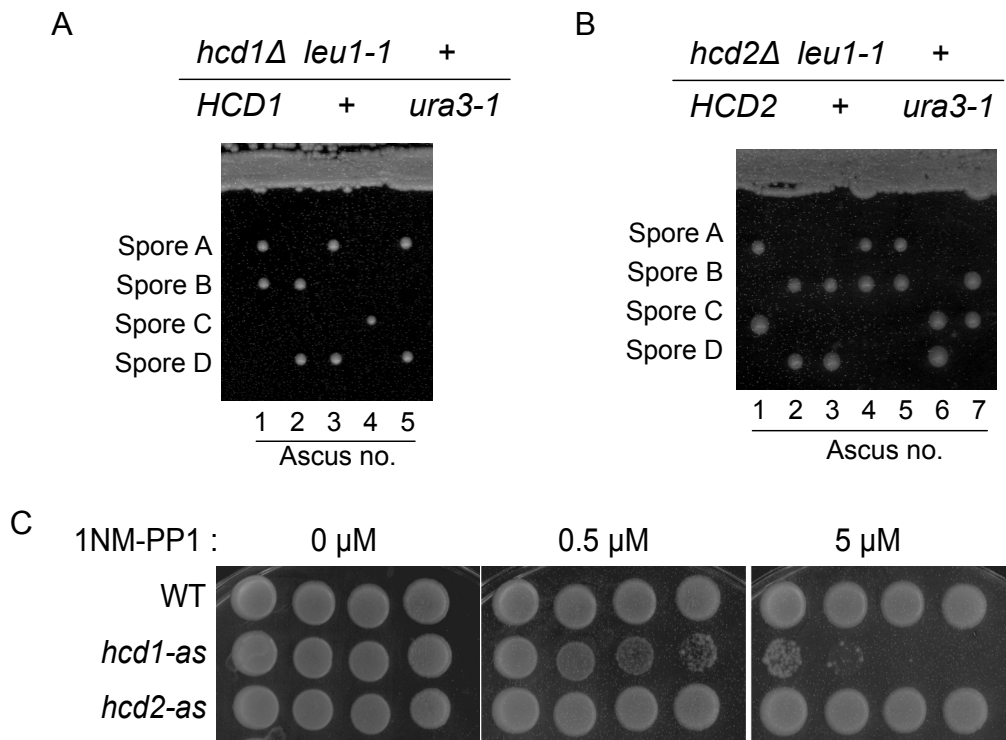

Figure 3

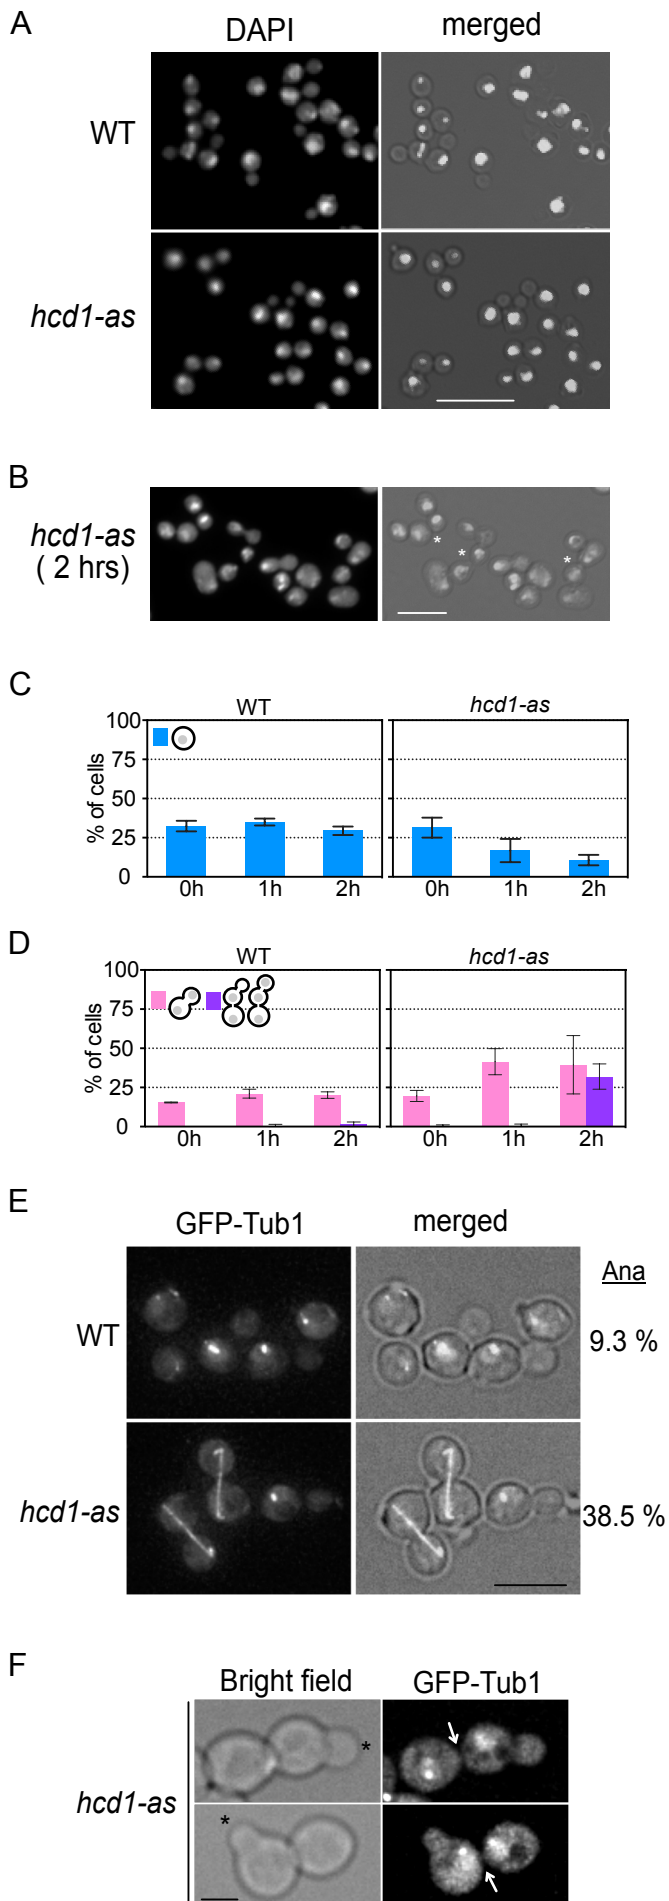



Figure 4

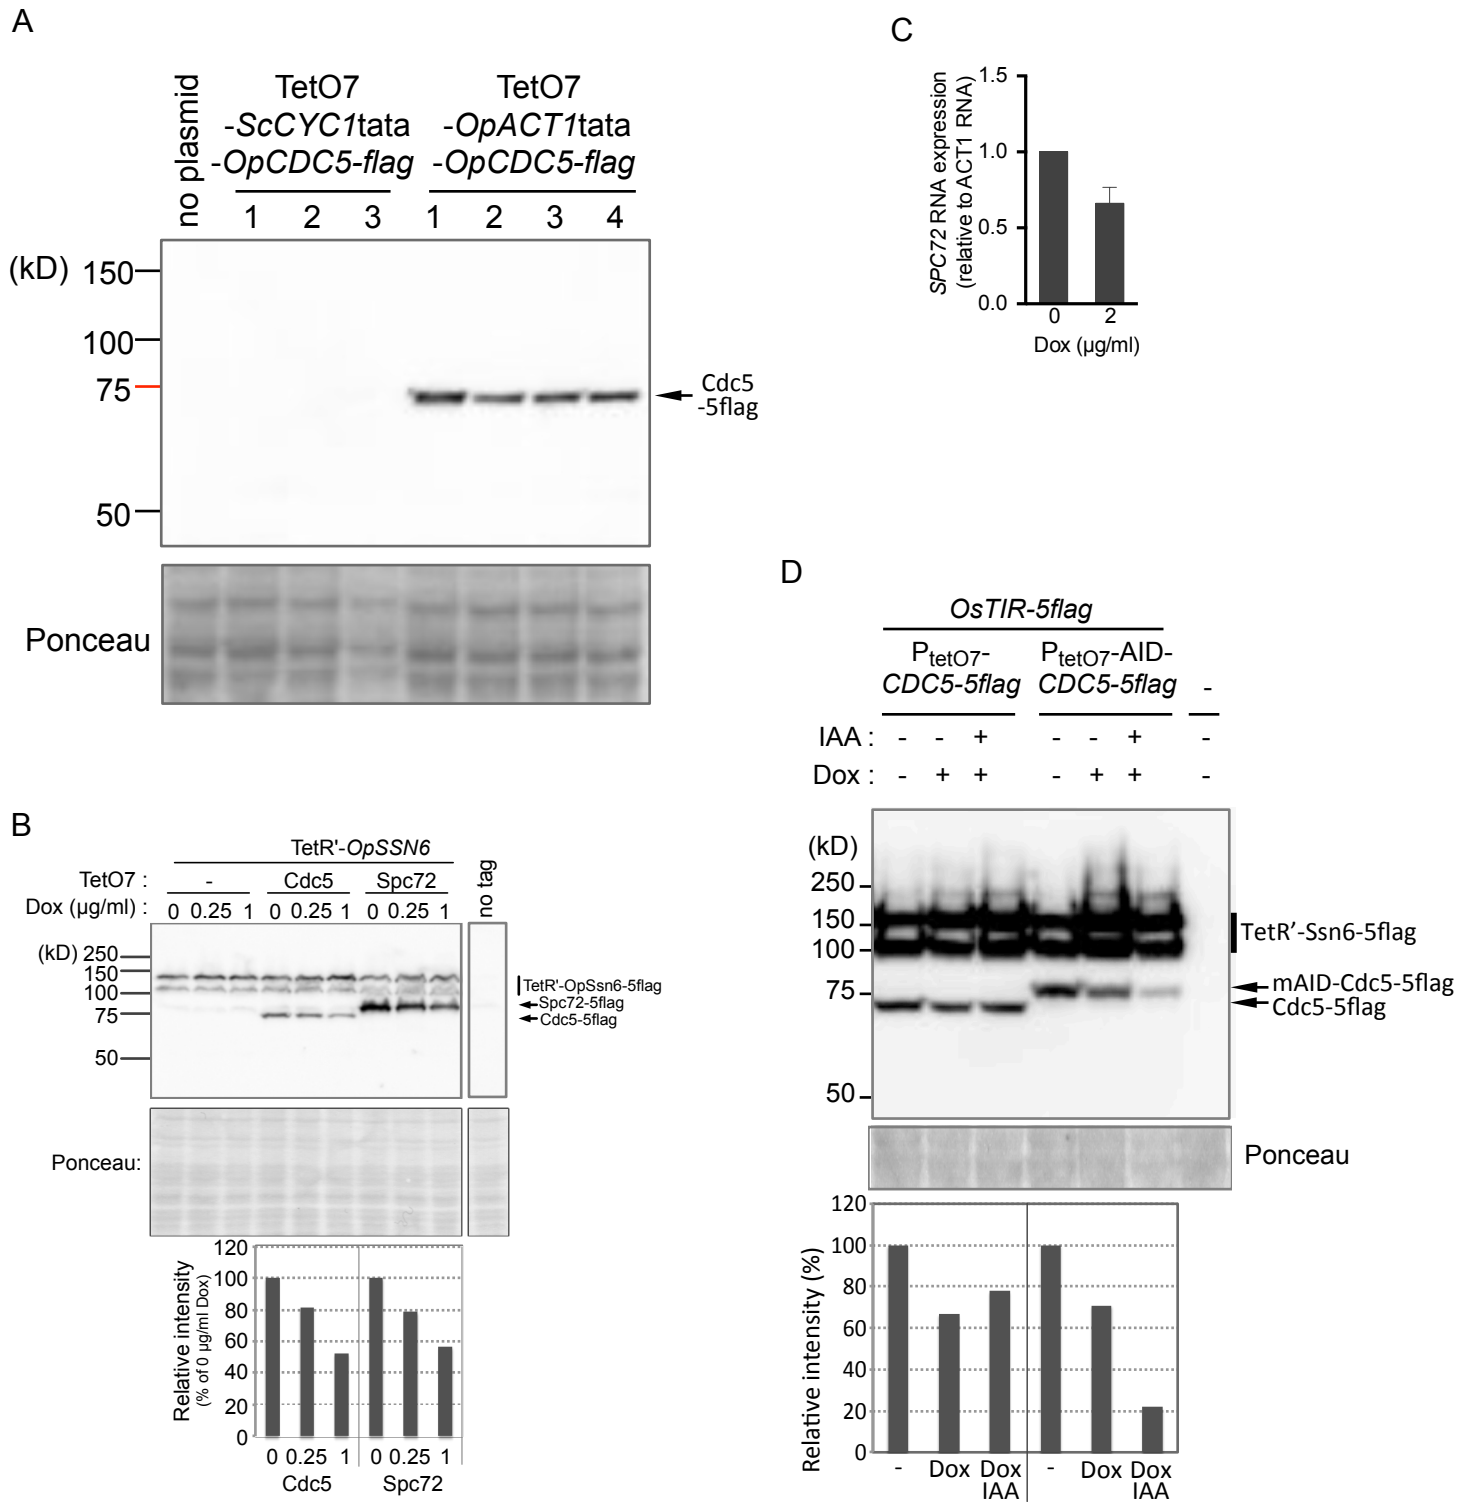

Figure 5

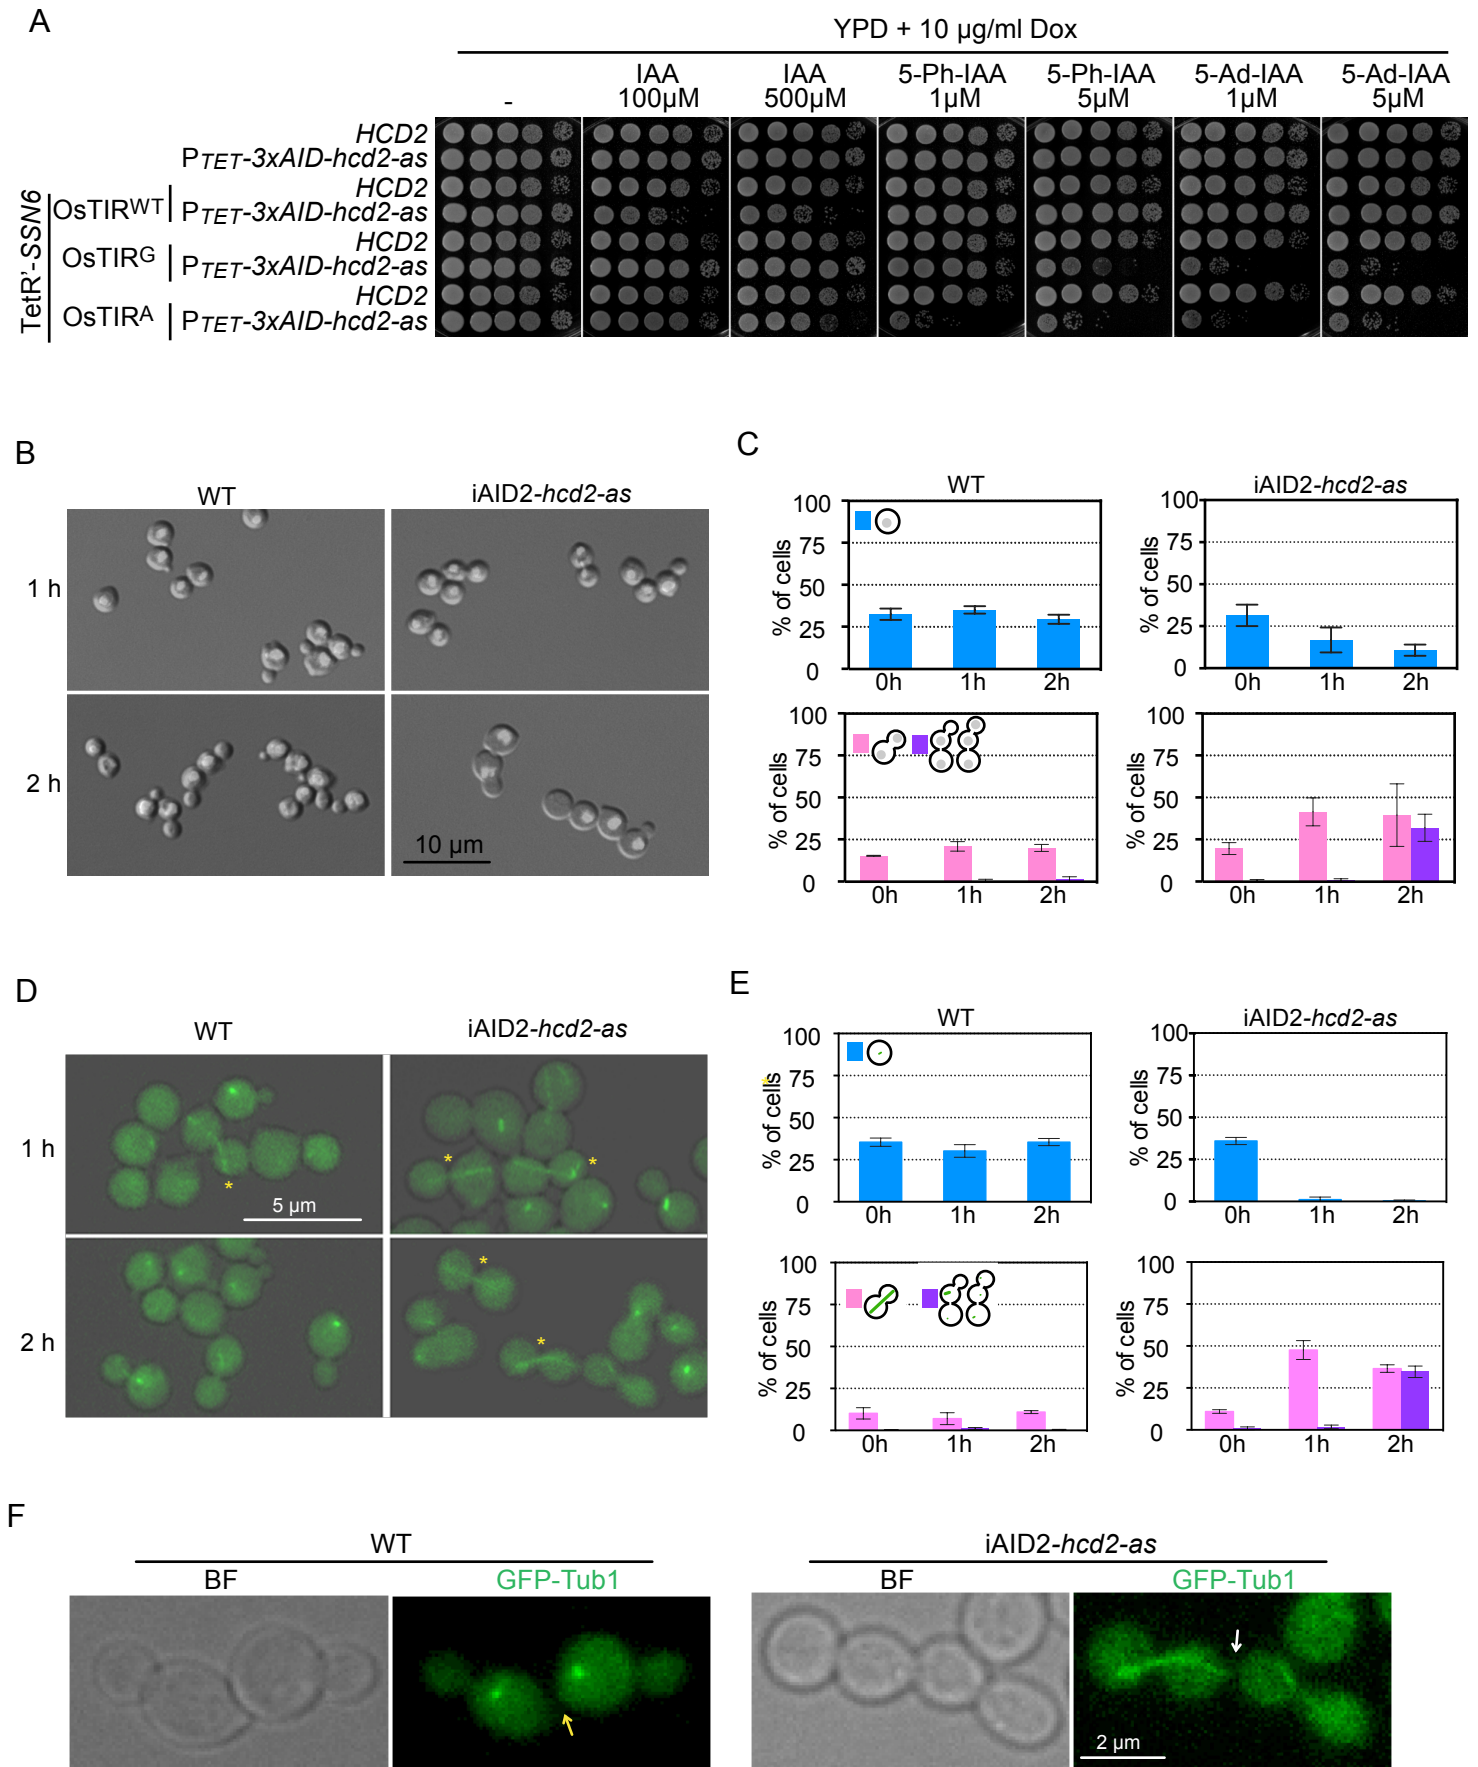

Source: https://biorxiv.org/content/10.1101/2021.09.27.461972v1.full.pdf
